# Supplementary material for: HLA‐DR/DQ molecular mismatch: A prognostic biomarker for primary alloimmunity
Source: PubMed Central journal article supplement — Am J Transplant. 2018 Dec 15;19(6):1708–19. doi: 10.1111/ajt.15177 (PMC6563434; doi:10.1111/ajt.15177), 2018-12-15
Supplement: AJT-19-1708-s005.pdf [file AJT-19-1708-s005.pdf]

**Table S1. HLA-DR/DQ Single Molecule Eplet Mismatch Alloimmune Risk Categories**

|                                    | <u>Low</u><br>DR 0-6<br>DQ 0-8<br><br>n=166 | <u>Intermediate</u><br>DR 7-22<br>DQ 0-14<br>or<br>DR 0-6<br>DQ 9-14<br><br>n=237 | <u>High</u><br>DR 0-22<br>DQ 15-31<br><br>n=261 | P value<br><br>All groups | P value<br><br>Intermediate vs.<br>High |
|------------------------------------|---------------------------------------------|-----------------------------------------------------------------------------------|-------------------------------------------------|---------------------------|-----------------------------------------|
| First Transplant                   | 91%                                         | 96%                                                                               | 97%                                             | 0.0123                    | 0.4809                                  |
| Recipient Age (years)              | 40.6±14.5                                   | 45.3±15.6                                                                         | 44.5±16.6                                       | 0.0025                    | 0.6012                                  |
| Donor Age (years)                  | 39.7±14.3                                   | 40.4±14.8                                                                         | 40.7±15.2                                       | 0.8153                    | 0.8119                                  |
| Living Donor                       | 63%                                         | 44%                                                                               | 42%                                             | <0.0001                   | 0.6837                                  |
| Ethnicity (Caucasian vs. other)    | 71%                                         | 66%                                                                               | 63%                                             | 0.2419                    | 0.4803                                  |
| Cold Ischemic Time (hours)         | 5.4±4.8                                     | 7.2±5.2                                                                           | 7.3±5.7                                         | 0.0022                    | 0.8207                                  |
| Delayed Graft Function             | 12%                                         | 12%                                                                               | 16%                                             | 0.3595                    | 0.2176                                  |
| Induction Therapy                  | 23%                                         | 47%                                                                               | 41%                                             | <0.0001                   | 0.1871                                  |
| Basiliximab                        | 14%                                         | 21%                                                                               | 18%                                             |                           |                                         |
| Thymoglobulin                      | 9%                                          | 25%                                                                               | 23%                                             |                           |                                         |
| Tacrolimus versus Cyclosporin      | 89%                                         | 88%                                                                               | 86%                                             | 0.6582                    | 0.6061                                  |
| Tacrolimus CV* 0-12 months (n=582) | 36.4±11.8                                   | 36.7±12.4                                                                         | 36.0±11.9                                       | 0.9072                    | 0.6706                                  |
| Mycophenolate                      | 100%                                        | 100%                                                                              | 100%                                            | ns                        | ns                                      |
| Non-Adherence                      | 13%                                         | 14%                                                                               | 18%                                             | 0.3131                    | 0.2139                                  |

\*CV, coefficient of variation
