# Supplementary material for: HLA‐DR/DQ molecular mismatch: A prognostic biomarker for primary alloimmunity
Source: PubMed Central journal article supplement — Am J Transplant. 2018 Dec 15;19(6):1708–19. doi: 10.1111/ajt.15177 (PMC6563434; doi:10.1111/ajt.15177), 2018-12-15
Supplement: AJT-19-1708-s006.pdf [file AJT-19-1708-s006.pdf]

**Table S2. Correlates of Banff  $\geq$ 1A T-cell Mediated Rejection Free Survival in the first year**

|                                    | Banff $\geq$ 1A T-cell<br>Mediated Rejection | No Banff $\geq$ 1A T-cell<br>Mediated Rejection |         |
|------------------------------------|----------------------------------------------|-------------------------------------------------|---------|
|                                    | n=111                                        | n=553                                           |         |
| First Transplant                   | 92%                                          | 86%                                             | 0.0801  |
| Recipient Age (years)              | 39.0 $\pm$ 17.2                              | 44.8 $\pm$ 15.8                                 | 0.0009  |
| Donor Age (years)                  | 38.6 $\pm$ 15.2                              | 40.7 $\pm$ 14.8                                 | 0.1661  |
| Living Donor                       | 43%                                          | 50%                                             | 0.2114  |
| Ethnicity (Caucasian vs. other)    | 10%                                          | 65%                                             | 0.3240  |
| Cold Ischemic Time (hours)         | 8.1 $\pm$ 6.3                                | 6.5 $\pm$ 5.1                                   | 0.0192  |
| Delayed Graft Function             | 24%                                          | 12%                                             | 0.0008  |
| Induction Therapy                  | 59%                                          | 35%                                             | <0.0001 |
| Basiliximab                        | 41%                                          | 18%                                             |         |
| Thymoglobulin                      | 14%                                          | 21%                                             |         |
| Tacrolimus versus Cyclosporin      | 63%                                          | 92%                                             | <0.0001 |
| Tacrolimus CV* 0-12 months (n=582) | 40.6 $\pm$ 13.4                              | 35.7 $\pm$ 11.7                                 | 0.0007  |
| Mycophenolate                      | 100%                                         | 100%                                            | ns      |
| Non-Adherence                      | 18%                                          | 15%                                             | 0.4033  |
| Molecular Mismatch Risk Groups     |                                              |                                                 | <0.0001 |
| Low                                | 12%                                          | 28%                                             |         |
| Intermediate                       | 32%                                          | 36%                                             |         |
| High                               | 56%                                          | 36%                                             |         |

\*CV, coefficient of variation
