# Supplementary material for: HLA‐DR/DQ molecular mismatch: A prognostic biomarker for primary alloimmunity
Source: PubMed Central journal article supplement — Am J Transplant. 2018 Dec 15;19(6):1708–19. doi: 10.1111/ajt.15177 (PMC6563434; doi:10.1111/ajt.15177), 2018-12-15
Supplement: AJT-19-1708-s007.pdf [file AJT-19-1708-s007.pdf]

**Table S3. Correlates of dnDSA Free Survival**

|                                    | HLA-DR/DQ<br>dnDSA<br>n=72 | No HLA-DR/DQ<br>dnDSA<br>n=592 |         |
|------------------------------------|----------------------------|--------------------------------|---------|
| First Transplant                   | 96%                        | 95%                            | 0.8281  |
| Recipient Age (years)              | 34.3±17.4                  | 45.0±15.6                      | <0.0001 |
| Donor Age (years)                  | 37.1±15.3                  | 40.8±14.7                      | 0.0637  |
| Living Donor                       | 40%                        | 50%                            | 0.1312  |
| Ethnicity (Caucasian vs. other)    | 75%                        | 65%                            | 0.0895  |
| Cold Ischemic Time (hours)         | 8.8±5.9                    | 6.6±5.2                        | 0.0008  |
| Delayed Graft Function             | 13%                        | 14%                            | 0.7502  |
| Induction Therapy                  | 46%                        | 38%                            | 0.2119  |
| Basiliximab                        | 32%                        | 17%                            |         |
| Thymoglobulin                      | 14%                        | 21%                            |         |
| Tacrolimus versus Cyclosporin      | 64%                        | 90%                            | <0.0001 |
| Tacrolimus CV* 0-12 months (n=582) | 39.6±14.6                  | 36.0±11.7                      | 0.0810  |
| Mycophenolate                      | 100%                       | 100%                           | ns      |
| Non-Adherence                      | 40%                        | 12%                            | <0.0001 |
| Molecular Mismatch Risk Groups     |                            |                                | <0.0001 |
| Low                                | 3%                         | 28%                            |         |
| Intermediate                       | 32%                        | 36%                            |         |
| High                               | 65%                        | 36%                            |         |

\*CV, coefficient of variation
