# Supplementary material for: HLA‐DR/DQ molecular mismatch: A prognostic biomarker for primary alloimmunity
Source: PubMed Central journal article supplement — Am J Transplant. 2018 Dec 15;19(6):1708–19. doi: 10.1111/ajt.15177 (PMC6563434; doi:10.1111/ajt.15177), 2018-12-15
Supplement: AJT-19-1708-s008.pdf [file AJT-19-1708-s008.pdf]

**Table S4. Correlates of Antibody Mediated Rejection Free Survival**

|                                    | Antibody Mediated Rejection | No Antibody Mediated Rejection |         |
|------------------------------------|-----------------------------|--------------------------------|---------|
|                                    | n=52                        | n=612                          |         |
| First Transplant                   | 92%                         | 96%                            | 0.3190  |
| Recipient Age (years)              | 35.1±17.4                   | 44.6±15.8                      | 0.0002  |
| Donor Age (years)                  | 35.9±14.5                   | 40.7±14.8                      | 0.0337  |
| Living Donor                       | 44%                         | 49%                            | 0.5066  |
| Ethnicity (Caucasian vs. other)    | 85%                         | 65%                            | 0.0019  |
| Cold Ischemic Time (hours)         | 7.9±5.7                     | 6.7±5.3                        | 0.0770  |
| Delayed Graft Function             | 12%                         | 14%                            | 0.6287  |
| Induction Therapy                  | 46%                         | 38%                            | 0.2750  |
| Basiliximab                        | 19%                         | 18%                            |         |
| Thymoglobulin                      | 17%                         | 21%                            |         |
| Tacrolimus versus Cyclosporin      | 69%                         | 89%                            | 0.0003  |
| Tacrolimus CV* 0-12 months (n=582) | 38.1±13.4                   | 36.2±11.9                      | 0.3574  |
| Mycophenolate                      | 100%                        | 100%                           | ns      |
| Non-Adherence                      | 42%                         | 13%                            | <0.0001 |
| Molecular Mismatch Risk Groups     |                             |                                | 0.0010  |
| Low                                | 10%                         | 27%                            |         |
| Intermediate                       | 28%                         | 36%                            |         |
| High                               | 62%                         | 37%                            |         |

\*CV, coefficient of variation
