# Supplementary material for: HLA‐DR/DQ molecular mismatch: A prognostic biomarker for primary alloimmunity
Source: PubMed Central journal article supplement — Am J Transplant. 2018 Dec 15;19(6):1708–19. doi: 10.1111/ajt.15177 (PMC6563434; doi:10.1111/ajt.15177), 2018-12-15
Supplement: AJT-19-1708-s009.pdf [file AJT-19-1708-s009.pdf]

**Table S5. Correlates of All Cause Graft Loss**

|                                    | Graft Loss<br>n=175 | No Graft Loss<br>n=489 | p value |
|------------------------------------|---------------------|------------------------|---------|
| First Transplant                   | 98%                 | 94%                    | 0.0176  |
| Recipient Age (years)              | 46.5±17.3           | 42.9±15.6              | 0.0036  |
| Donor Age (years)                  | 41.8±14.8           | 39.7±14.8              | 0.1452  |
| Living Donor                       | 35%                 | 54%                    | <0.0001 |
| Ethnicity (Caucasian vs. other)    | 66%                 | 66%                    | 0.8576  |
| Cold Ischemic Time (hours)         | 9.0±6.0             | 6.0±4.9                | <0.0001 |
| Delayed Graft Function             | 26.3%               | 9.2%                   | <0.0001 |
| Induction Therapy                  | 45%                 | 37%                    | 0.0800  |
| Basiliximab                        | 25%                 | 16%                    |         |
| Thymoglobulin                      | 19%                 | 21%                    |         |
| Tacrolimus versus Cyclosporin      | 74%                 | 92%                    | <0.0001 |
| Tacrolimus CV* 0-12 months (n=582) | 39.9±13.0           | 35.3±11.5              | <0.0001 |
| Mycophenolate                      | 100%                | 100%                   | ns      |
| Non-Adherence                      | 23%                 | 13%                    | 0.0019  |
| Molecular Mismatch Risk Groups     |                     |                        | 0.0134  |
| Low                                | 19%                 | 27%                    |         |
| Intermediate                       | 33%                 | 37%                    |         |
| High                               | 48%                 | 36%                    |         |

\*CV, coefficient of variation
