# Supplementary figures and images for: HLA‐DR/DQ molecular mismatch: A prognostic biomarker for primary alloimmunity
Source: PubMed Central journal article supplement — Am J Transplant. 2018 Dec 15;19(6):1708–19. doi: 10.1111/ajt.15177 (PMC6563434; doi:10.1111/ajt.15177), 2018-12-15

**Figure S1. Graft Survival by dnDSA HLA Class**

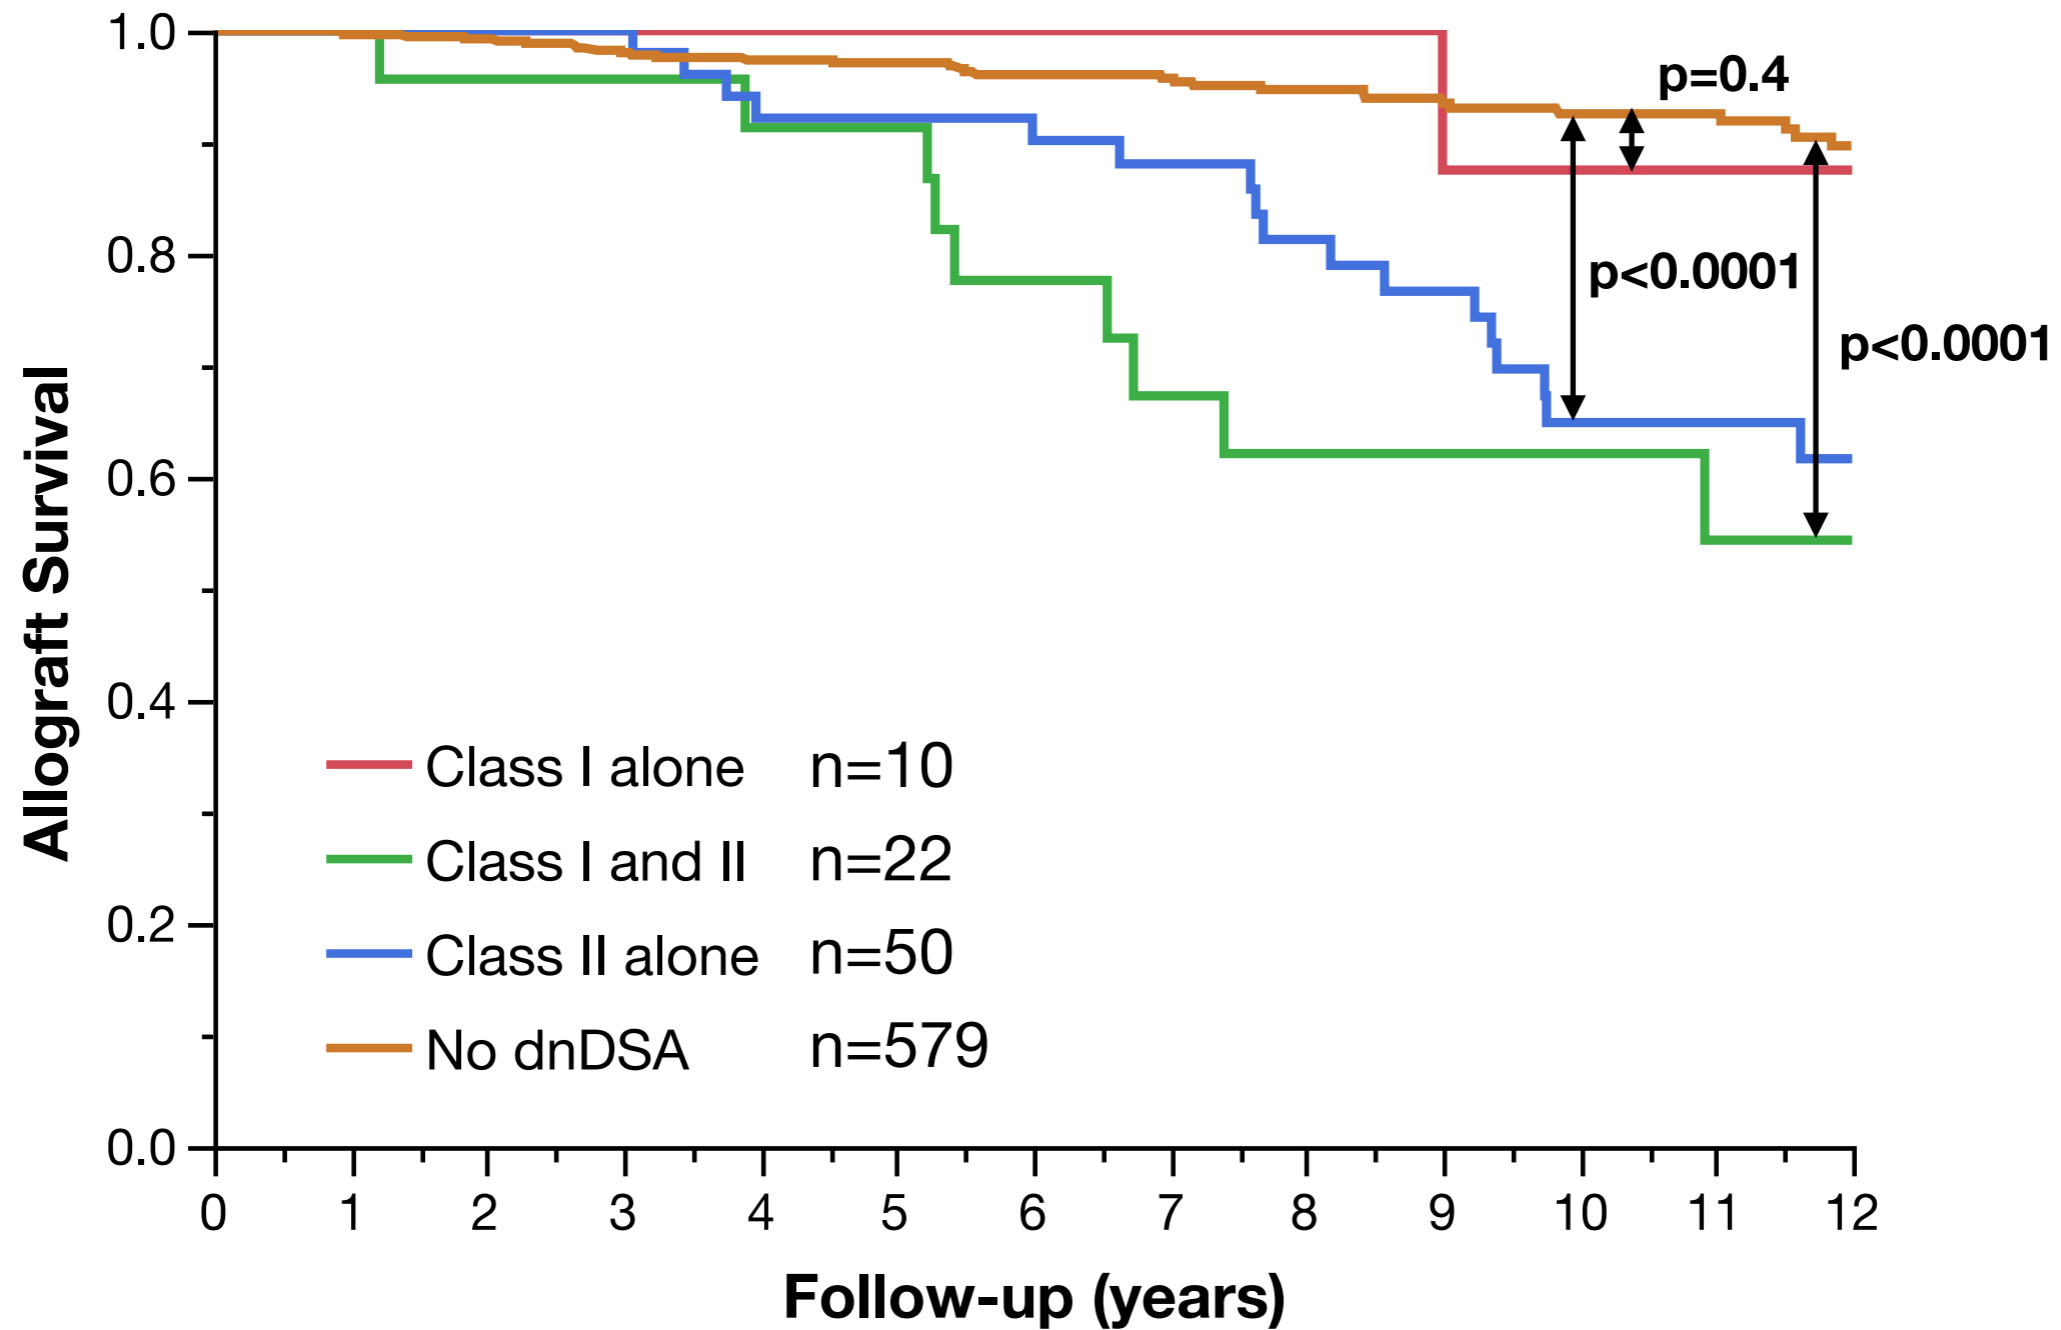

Supplement: AJT-19-1708-s001.pdf [file AJT-19-1708-s001.pdf]

**Figure S2. Receiver Operating Characteristic Curves for dnDSA development**

## HLA-DR

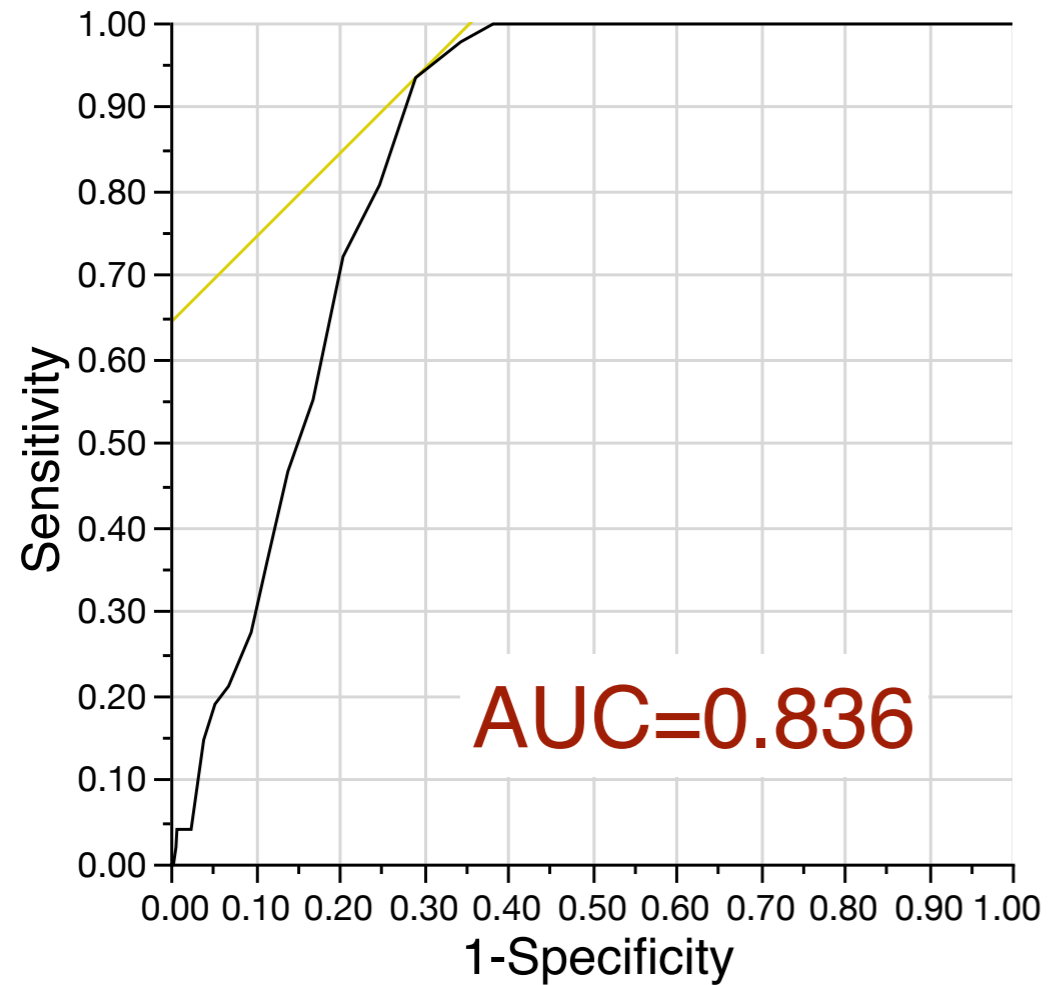

## HLA-DQ

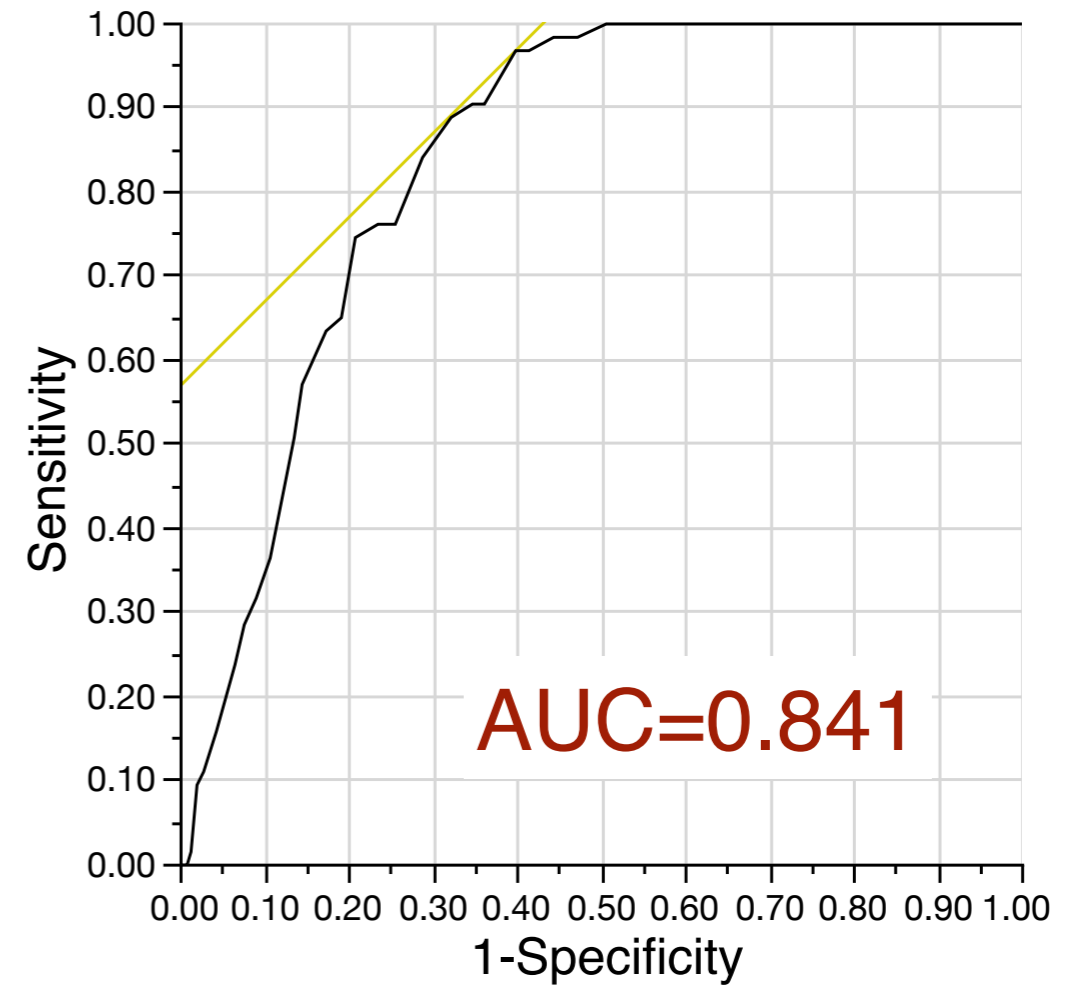

Supplement: AJT-19-1708-s002.pdf [file AJT-19-1708-s002.pdf]

**Figure S3. HLA-DR and HLA-DQ dnDSA Free Survival by Traditional Whole Antigen Mismatch**

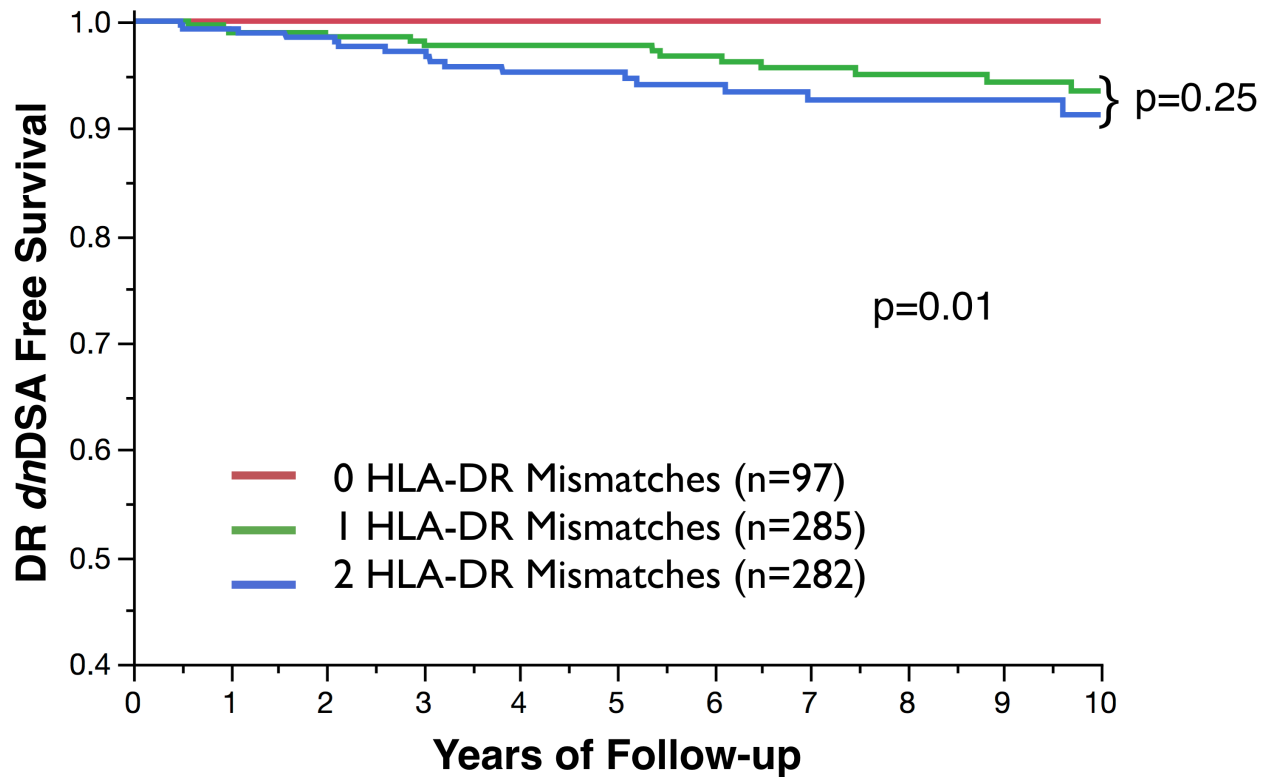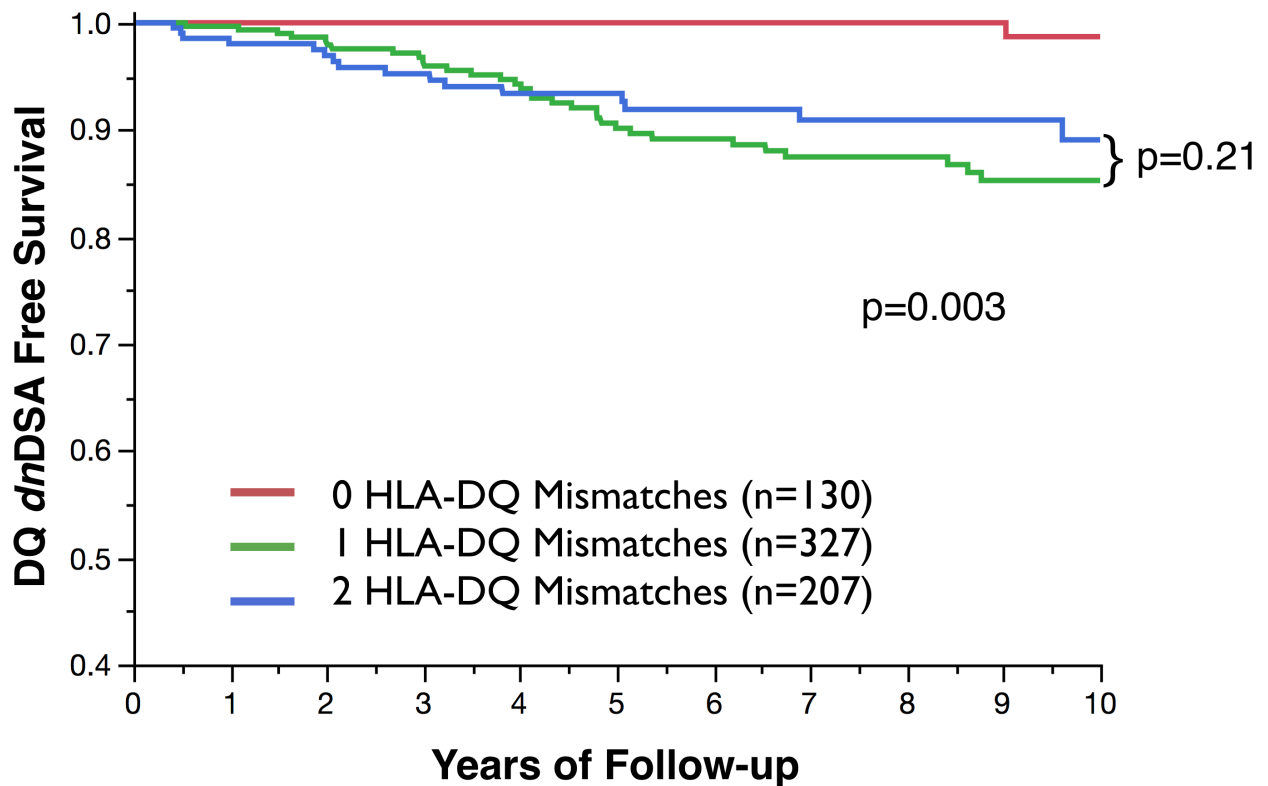

Supplement: AJT-19-1708-s003.pdf [file AJT-19-1708-s003.pdf]

Figure S4. All Cause Graft Loss by HLA Molecular Mismatch Category

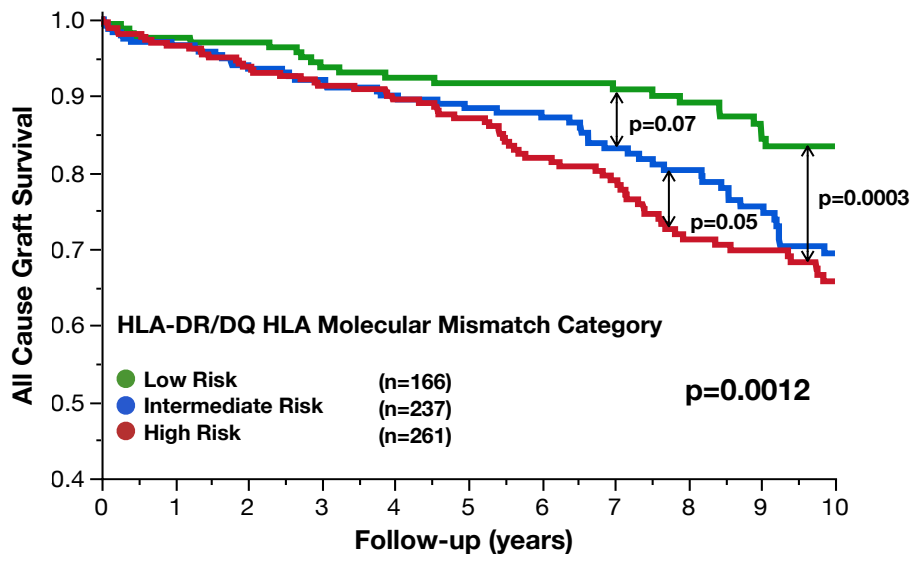

Supplement: AJT-19-1708-s004.pdf [file AJT-19-1708-s004.pdf]
